# Supplementary material
Source: Springer Nature journal article supplement (https://www.springermedizin.de/resource/supplementary/13195_2014_217_MOESM6_ESM.pdf/9688502)

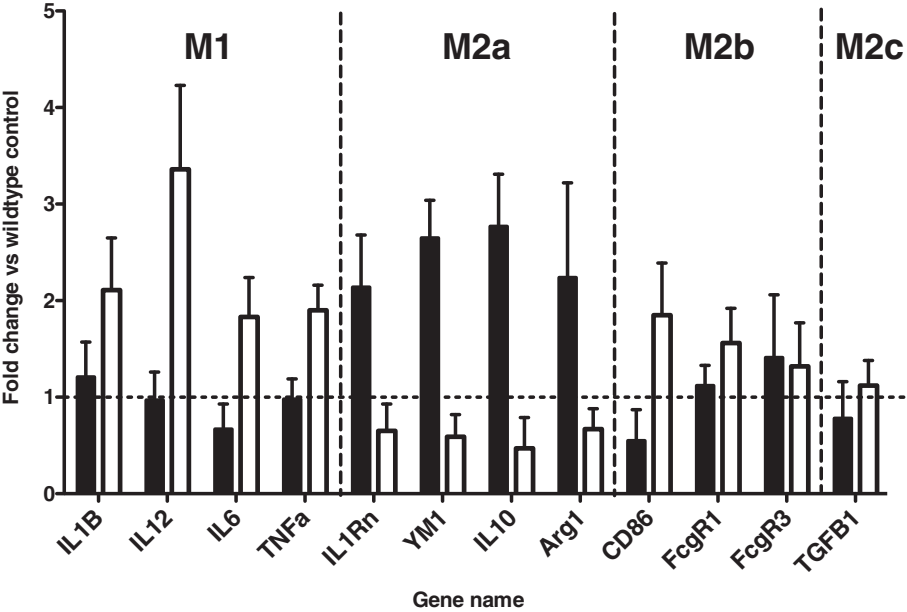

Supplement: MOESM6 [file 9688502]
